# Supplementary material for: Insights into the 5,5′-bis(1H-tetrazolyl)amine monohydrate (BTA·H2O) pyrolysis mechanism: integrated experimental and kinetic model analysis
Source: Royal Society of Chemistry journal article supplement (doi:10.1039/d3nj05438a), 2024-01-01
Supplement: d3nj05438a1.pdf [file d3nj05438a1.pdf]

## **Insights into 5, 5'-bis(1H-tetrazol-5-yl) amine (BTA) pyrolysis mechanism: Integrated experimental and kinetic model analysis**

Jianwei Zhang<sup>a,b</sup>, Ling Chen<sup>a,b\*</sup>, Peichen Han<sup>a,b</sup>, Chunzhi Li<sup>d</sup>, Ye Yuan<sup>d</sup>, Bo Wu<sup>c</sup>,  
Feiyun Chen<sup>a,b</sup>, Weidong He<sup>a,b\*</sup>

<sup>a</sup> School of Chemistry and Chemical Engineering, Nanjing University of Science and Technology,  
Nanjing, Jiangsu, 210094, China;

<sup>b</sup> Key Laboratory of Special Energy Materials, Ministry of Education, Nanjing, Jiangsu, 210094,  
China;

<sup>c</sup> State Key Laboratory of Environment-friendly Energy Materials, Southwest University of Science  
and Technology, Mianyang, 621010, China;

<sup>d</sup> Scientific Research Institute, Luzhou North Chemistry Industry Corporation, Luzhou, Sicuan,  
646605, China;

Corresponding Email:

Ling Chen: [l\\_chen\\_zf\\_139@njjust.edu.cn](mailto:l_chen_zf_139@njjust.edu.cn); Weidong He: [hewedong@njjust.edu.cn](mailto:hewedong@njjust.edu.cn);

## S1. Materials

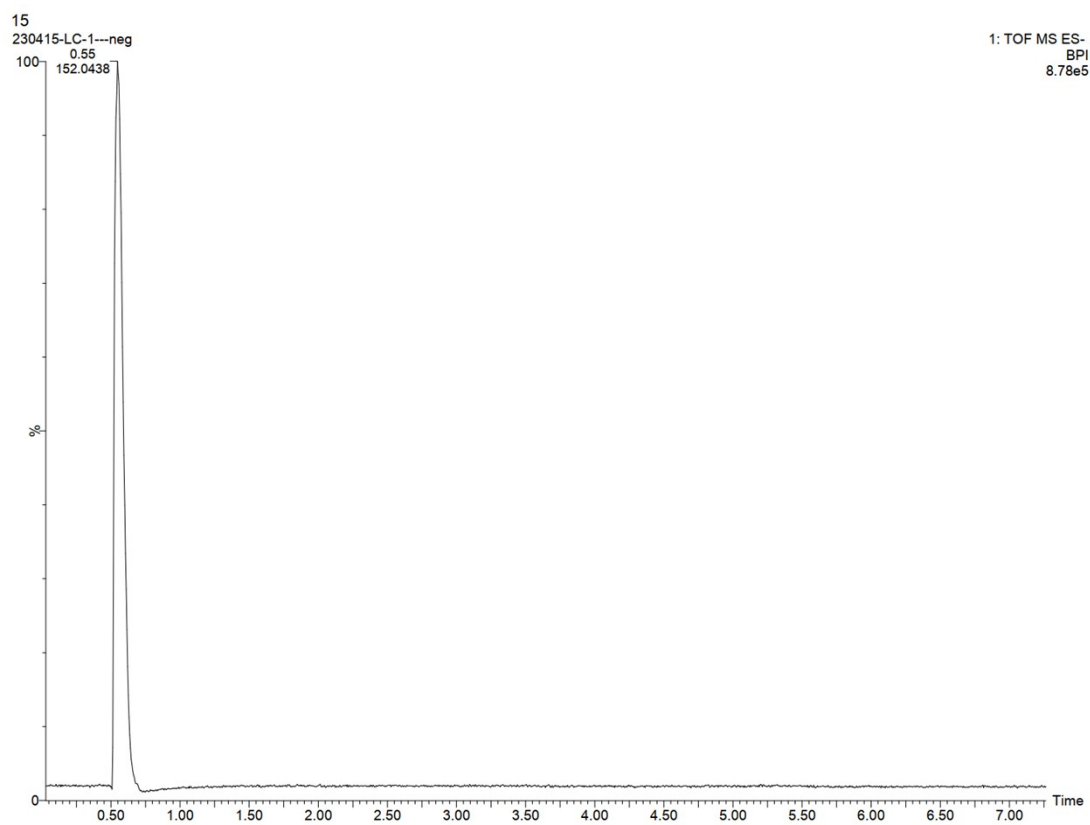

**Fig S1.** HPLC curves of BTA·H<sub>2</sub>O under alkaline condition.

## S2. Thermal analysis methods

TG-DTG measurements were performed in the temperature range 50 °C to 800 °C at the heating rate of 1, 2, 5, 10 °C•min<sup>-1</sup>, under argon atmosphere at a flow rate of 20 mL•min<sup>-1</sup> by using PerkinElmer STA 8000. The sample mass was about 0.60 mg. A blank test was performed prior to each experiment to obtain a baseline to eliminate systematic errors in this instrument.

DSC measurements of samples were run by NETZSCH DSC 204F1. Alumina crucibles with a lid having small (pin size) hole in the center were used. The scavenging gas and protective gas were nitrogen and the flow rate was 40 mL•min<sup>-1</sup> and 60 mL•min<sup>-1</sup>, respectively. The sample mass was about 0.60 mg. The sample was tested at the heating rate of 2 °C•min<sup>-1</sup> within the temperature range of 50 °C to 300 °C.

## S3. Morphology, structure and composition analysis

**TableS1.** Crystallographic data and parameters.

|                         | BTA•H <sub>2</sub> O                           | BTA                                          |
|-------------------------|------------------------------------------------|----------------------------------------------|
| Formula                 | C <sub>2</sub> H <sub>5</sub> N <sub>9</sub> O | C <sub>2</sub> H <sub>3</sub> N <sub>9</sub> |
| Crystal system          | Monoclinic                                     | Orthorhombic                                 |
| Space group             | <i>P2<sub>1</sub>/c</i> (14)                   | <i>Pbca</i> (61)                             |
| Color/habit             | Colorless/plates                               | Colorless/needles                            |
| ρ/(g cm <sup>-3</sup> ) | 1.693                                          | 1.861                                        |
| CCDC                    | 687771                                         | 299051                                       |

**TableS2.** The high resolution N1s spectra analysis results of BTA•H<sub>2</sub>O and BTA.

| Species                              | BTA-H <sub>2</sub> O |         | BTA     |         |
|--------------------------------------|----------------------|---------|---------|---------|
|                                      | Peak/eV              | Content | Peak/eV | Content |
| N1 (C= <u>N</u> -N)                  | 399.5                | 13.6    | 399.4   | 12.7    |
| N2 (N= <u>N</u> -N)                  | 400.1                | 20.1    | 400.0   | 17.3    |
| N3 (C- <u>N</u> (H)-C)               | 400.8                | 24.2    | 400.7   | 25.8    |
| N4(C- <u>N</u> (H)-N)                | 401.3                | 27.4    | 401.2   | 28.3    |
| N5 (=N <sup>+</sup> H <sup>-</sup> ) | 401.9                | 14.6    | 401.8   | 15.9    |

#### S4. TG-DTG and DSC curves analysis

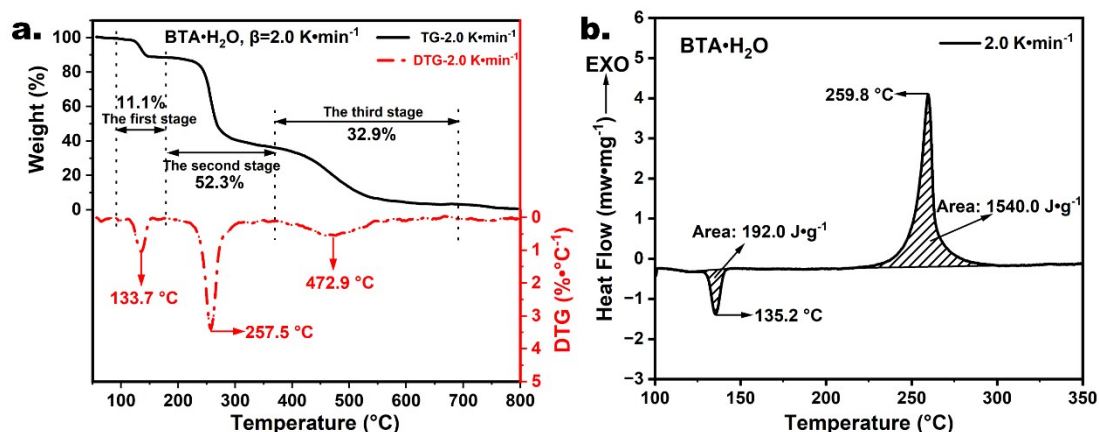

**Fig.S2.** The TG-DTG (a.) and DSC (b.) curves of BTA·H<sub>2</sub>O at the heating rate of 2 K·min<sup>-1</sup>.

The TG and DTG curves for BTA·H<sub>2</sub>O pyrolysis at a heating rate of 2 °C·min<sup>-1</sup> were presented in **Fig.S2a**, illustrating the typical thermal behavior. Based on the shape of the TG-DTG curve, it was evident that thermal decomposition process of BTA·H<sub>2</sub>O involved a complex reaction with three primary mass loss processes. The initial mass loss process (91.1 °C ~178.5 °C) corresponded to the removal of crystalline water within the molecule, resulting in a weight loss of 11.1% and a DTG peak temperature at 133.7 °C. The second mass loss process (178.5 °C ~ 368.4 °C) exhibited a distinct weight reduction of 52.3% and a DTG peak temperature at 257.5 °C, indicating the conversion of a portion of BTA into gaseous compounds containing carbon and nitrogen elements. Subsequently, there was a gradual decrease in weight starting from 368.4 °C until complete decomposition occurred with almost no residue remaining as the temperature reached 690.5 °C. Notably, chemical reactions among residual components primarily contributed to a mass loss of 32.9%, with the maximum weight reduction observed at 472.9 °C.

According to the DSC curve obtained at a heating rate of 2 °C·min<sup>-1</sup>, as depicted in **Fig.S2b**, two distinct processes were observed. The first process was an endothermic reaction attributed to the loss of crystalline water, characterized by a decomposition peak temperature of 135.2 °C and an

enthalpy change of  $-192.0 \text{ J}\cdot\text{g}^{-1}$ . The second process corresponded to the thermal decomposition of BTA and exhibited significant exothermic behavior within the temperature range of  $213.4 \text{ }^\circ\text{C}$  to  $301.1 \text{ }^\circ\text{C}$ , with a decomposition peak temperature recorded at  $259.8 \text{ }^\circ\text{C}$  and an enthalpy change measured at  $1540.0 \text{ J}\cdot\text{g}^{-1}$ . Notably, the sharp exothermic peak indicated that the thermal decomposition process of BTA occurred rapidly, consistent with instantaneous energy release from energetic materials.

## S5. Pyrolysis process and product analysis

**TableS3.** Detailed information of C 1s, N1s and O1s spectra from BTA and pyrolysis products of BTA at 212.5 °C form XPS analysis, indicating peak position, FWHM and Area.

| Species         | BTA     |      |          | BTA-212.5 °C |      |          |
|-----------------|---------|------|----------|--------------|------|----------|
|                 | Peak/eV | FWHM | Area     | Peak/eV      | FWHM | Area     |
| Adc             | 284.80  | 1.41 | 5146.48  | 285.10       | 1.43 | 7513.76  |
| C1              | 286.50  | 1.87 | 2980.40  | 287.18       | 1.81 | 2158.73  |
| C2(N-C(-N)-N)   | 288.40  | 1.38 | 23039.62 | 288.69       | 1.35 | 27592.73 |
| N1 (C=N-N)      | 399.61  | 1.02 | 19717.81 | 399.73       | 1.10 | 23453.86 |
| N2 (N=N-N)      | 400.24  | 0.85 | 26794.99 | 400.4        | 0.90 | 34610.45 |
| N3 (C-N(H)-C)   | 400.87  | 0.78 | 39900.61 | 401.05       | 0.79 | 49039.89 |
| N4 (C-N(H)-N)   | 401.43  | 0.84 | 43786.03 | 401.61       | 0.79 | 53771.79 |
| N5 (Positive N) | 401.80  | 1.05 | 24539.12 | 401.61       | 0.96 | 29196.53 |
| O2              | 532.75  | 2.19 | 6059.21  | 532.97       | 2.56 | 5240.02  |

**TableS4.** Detailed information of C 1s, N1s and O1s spectra from pyrolysis products of BTA at 225.0 °C and 237.5 °C form XPS analysis, indicating peak position, FWHM and Area.

| Species                 | BTA-225.0 °C |      |          | BTA-237.5 °C |      |          |
|-------------------------|--------------|------|----------|--------------|------|----------|
|                         | Peak/eV      | FWHM | Area     | Peak/eV      | FWHM | Area     |
| Adc                     | 285.13       | 1.38 | 4338.72  | 284.94       | 1.33 | 7385.06  |
| C1                      | 286.91       | 1.54 | 1669.33  | 286.80       | 1.67 | 3063.25  |
| C2(N-C(-N)-N)           | 288.76       | 1.33 | 15560.65 | 288.65       | 1.37 | 26043.12 |
| C3(Csp <sup>2</sup> -N) | 287.89       | 1.25 | 3272.20  | 287.83       | 1.27 | 7833.36  |
| N1 (C=N-N)              | 400.05       | 0.90 | 21457.52 | 399.84       | 0.82 | 34165.87 |
| N2 (N=N-N)              | 400.67       | 0.77 | 24850.35 | 400.45       | 0.74 | 38455.79 |
| N3 (C-N(H)-C)           | 401.22       | 0.72 | 27691.86 | 401.02       | 0.71 | 43534.02 |
| N4 (C-N(H)-N)           | 401.73       | 0.78 | 29387.03 | 401.55       | 0.76 | 42950.80 |
| N5 (Positive N)         | 402.31       | 0.95 | 14428.75 | 402.15       | 0.90 | 21003.69 |
| N6                      | 399.38       | 1.11 | 10414.18 | 399.16       | 0.99 | 18281.93 |
| O1                      | -            | -    | -        | 531.65       | 1.26 | 2626.05  |
| O2                      | 532.91       | 2.44 | 4131.60  | 532.49       | 1.21 | 2417.25  |
| O3                      | -            | -    | -        | 533.47       | 1.55 | 2639.81  |

## S6. Autocatalytic characteristics analysis

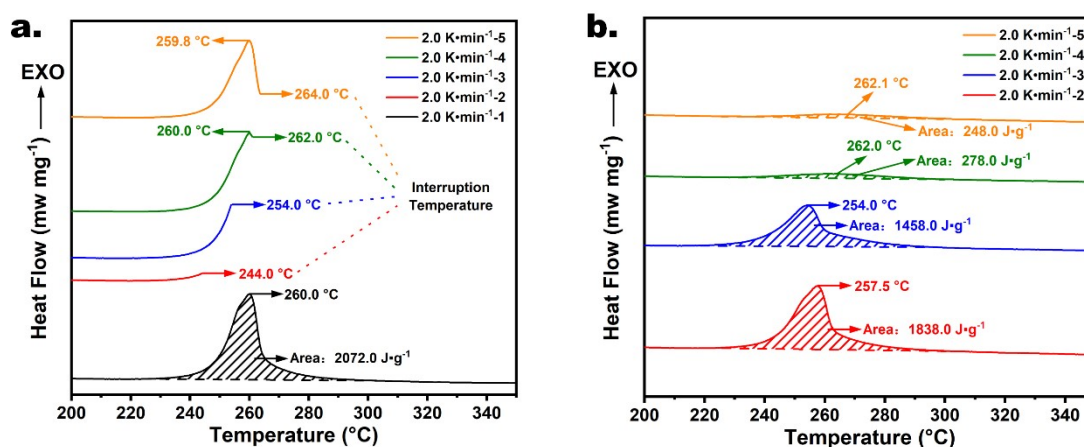

**Fig.S3.** Comparison of the reheat curve (b.) at different interruption temperatures and the original curve (a) at the heating rate of 2.0 K•min<sup>-1</sup>.

The thermal history experiments conducted at various interruption temperatures were illustrated in **Fig.S3**, while the experimental conditions and results are presented in **TableS5**. The BTA contained within an aluminum crucible with a pinhole was subjected to heating at four distinct interruption temperatures: namely, 244 °C, 254 °C, 262 °C, and 264 °C. This approach aimed to simulate different levels of thermal history experienced by the sample. The  $T_{\text{peak}}$  in the 2.0 K•min<sup>-1-1</sup> curve under the initial non-thermal history state was determined to be 260.0 °C, as evidenced by **Fig.5a** and **TableS5**. The corresponding conversion degrees  $\alpha$  were found to be 0.03 and 0.24 at interruption temperatures of 244.0 °C and 254.0 °C, respectively, indicating the progress of the reaction. Subsequently, after undergoing thermal history, both  $T_{\text{peak}}$  values in the 2.0 K•min<sup>-1-2</sup> and 2.0 K•min<sup>-1-3</sup> curves shifted towards lower temperatures, as shown in **Fig.S3b**, resulting in a decrease in safety.

Therefore, the initial stage decomposition reaction of BTA can be characterized as an autocatalytic process. During storage and application, a gradual decomposition of stored BTA occurred, resulting in the formation of catalytic byproducts that facilitate its thermal degradation and effectively lower the onset temperature for decomposition. Consequently, it is imperative to

avoid extensive storage and heat sources to prevent any potential thermal history and further mitigate the risk of BTA explosion. After the thermal history,  $T_{\text{peak}}$  of 2.0 K•min<sup>-1</sup>-4 and 2.0 K•min<sup>-1</sup>-5 remained the same or increased slightly. Therefore, the second stage decomposition reaction of BTA was an n-order reaction.

**TableS5.** Thermal history experiment curves of BTA at different interruption temperatures.

| Mark                       | Interruption temp./( $^{\circ}\text{C}$ ) | Conversion degree $\alpha$ | $T_{\text{peak}} / (^{\circ}\text{C})$ | $\Delta H / (\text{J}\cdot\text{g}^{-1})$ |
|----------------------------|-------------------------------------------|----------------------------|----------------------------------------|-------------------------------------------|
| 2.0 K•min <sup>-1</sup> -1 | -                                         | -                          | 260.0                                  | 2072.0                                    |
| 2.0 K•min <sup>-1</sup> -2 | 244.0                                     | 0.03                       | 257.5                                  | 1838.0                                    |
| 2.0 K•min <sup>-1</sup> -3 | 254.0                                     | 0.24                       | 254.0                                  | 1458.0                                    |
| 2.0 K•min <sup>-1</sup> -4 | 262.0                                     | 0.63                       | 262.0                                  | 278.4                                     |
| 2.0 K•min <sup>-1</sup> -5 | 264.0                                     | 0.67                       | 262.1                                  | 247.7                                     |



## S7. Kinetics model analysis---the thermal decomposition process of BTA•H<sub>2</sub>O

**Table S6.** The relative contributions of three reaction processes to the overall reaction for BTA•H<sub>2</sub>O pyrolysis.

| $\beta$<br>(°C•min <sup>-1</sup> ) | Process 1                                |      | Process 2                                |      | Process 3                                |      |
|------------------------------------|------------------------------------------|------|------------------------------------------|------|------------------------------------------|------|
|                                    | Relative contribution (%)<br>Region (°C) | %    | Relative contribution (%)<br>Region (°C) | %    | Relative contribution (%)<br>Region (°C) | %    |
| 1                                  | 114.40~146.13                            | 8.9  | 209.26~368.46                            | 53.5 | 368.46~624.60                            | 29.8 |
| 2                                  | 115.73~152.53                            | 9.8  | 209.20~368.13                            | 51.5 | 369.20~691.33                            | 33.0 |
| 5                                  | 118.16~174.16                            | 10.2 | 209.16~368.16                            | 49.0 | 368.82~690.82                            | 36.6 |
| 10                                 | 120.65~177.48                            | 9.4  | 208.81~368.48                            | 47.6 | 369.15~691.15                            | 37.4 |
| Average                            |                                          | 9.6  |                                          | 50.4 |                                          | 34.2 |

**TableS7.** Kinetic model test for BTA•H<sub>2</sub>O pyrolysis in first stage.

| Method/Kinetic Model |                |                | R <sup>2</sup> | S <sup>2</sup> | MR    | F-Test |
|----------------------|----------------|----------------|----------------|----------------|-------|--------|
| Method: Friedman     |                |                | 0.99814        | 143.459        | 0.281 | 3.057  |
| Kinetic Model        | A→B            | B→C            |                |                |       |        |
|                      | A <sub>2</sub> | F <sub>1</sub> | 0.99919        | 62.599         | 0.175 | 1.061  |
| A→B→C                | A <sub>3</sub> | F <sub>1</sub> | 0.99875        | 96.560         | 0.235 | 1.637  |
|                      | A <sub>3</sub> | F <sub>n</sub> | 0.99880        | 92.809         | 0.232 | 1.575  |
|                      | A <sub>n</sub> | F <sub>n</sub> | 0.99924        | 58.851         | 0.172 | 1.000  |

**TableS8.** Kinetic model test for BTA•H<sub>2</sub>O pyrolysis in second stage.

| Method/Kinetic Model |                  |                | R <sup>2</sup> | S <sup>2</sup> | MR    | F-Test |
|----------------------|------------------|----------------|----------------|----------------|-------|--------|
| Method: Friedman     |                  |                | 0.99937        | 1148.864       | 0.456 | 1.101  |
| Kinetic Model        | C→D              | D→E            |                |                |       |        |
|                      | C <sub>1</sub>   | F <sub>n</sub> | 0.99922        | 1419.811       | 0.553 | 1.240  |
| C→D→E                | C <sub>n</sub>   | F <sub>n</sub> | 0.99933        | 1221.060       | 0.463 | 1.067  |
|                      | C <sub>n,m</sub> | F <sub>n</sub> | 0.99935        | 1185.166       | 0.448 | 1.036  |
|                      | KS               | F <sub>n</sub> | 0.99938        | 1143.223       | 0.426 | 1.000  |

**TableS9.** Kinetic model test for BTA•H<sub>2</sub>O pyrolysis in third stage.

| Method/Kinetic Model |                |                  | R <sup>2</sup> | S <sup>2</sup> | MR    | F-Test |
|----------------------|----------------|------------------|----------------|----------------|-------|--------|
| Method: Friedman     |                |                  | 0.99872        | 827.545        | 0.488 | 1.136  |
| Kinetic Model        | E→F            | F→G or G→H       |                |                |       |        |
|                      | E→F            | F <sub>n</sub>   | 0.99800        | 1290.855       | 0.686 | 1.575  |
| E→F→G                | F <sub>n</sub> | C <sub>1</sub>   | 0.99822        | 1149.265       | 0.658 | 1.405  |
|                      | F <sub>n</sub> | C <sub>n</sub>   | 0.99869        | 846.576        | 0.581 | 1.036  |
|                      | F <sub>n</sub> | C <sub>n,m</sub> | 0.99873        | 816.948        | 0.567 | 1.000  |
|                      | F <sub>n</sub> | KS               | 0.99866        | 866.348        | 0.578 | 1.061  |
|                      | F <sub>n</sub> | C <sub>n</sub>   | 0.99860        | 902.506        | 0.593 | 1.104  |
| E→F                  | F <sub>n</sub> | C <sub>n,m</sub> | 0.99860        | 901.475        | 0.591 | 1.103  |
| G→H                  | F <sub>n</sub> | KS               | 0.99849        | 975.250        | 0.630 | 1.194  |

## S8. Thermal decomposition mechanism analysis

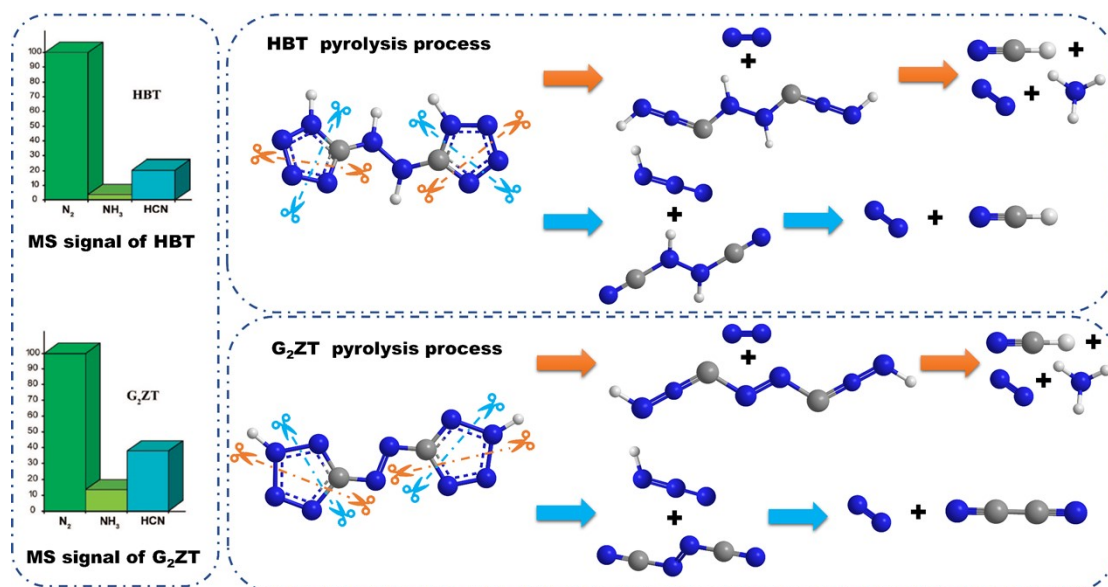

Fig.S4 The pyrolysis products of HBT and  $G_2ZT$ .
